# Supplementary material for: Effects of remimazolam combined with remifentanil on quality of recovery after ambulatory hysteroscopic surgery: a prospective, observational study
Source: PubMed Central journal article supplement — Anesth Pain Med (Seoul). 2024 Jan 31;19(1):44–53. doi: 10.17085/apm.23102 (PMC10846998; doi:10.17085/apm.23102), 2024-01-31
Supplement: apm-23102-Supplementary-Table-1.pdf [file apm-23102-Supplementary-Table-1.pdf]

**Supplementary Table 1.** QoR-15K dimensions and corresponding QoR-15K items

---

|                       |                                                 |
|-----------------------|-------------------------------------------------|
| Pain                  | Moderate pain                                   |
|                       | Severe pain                                     |
| Physical comfort      | Able to breathe easy                            |
|                       | Have a good sleep                               |
|                       | Being able to enjoy food                        |
|                       | Feel rested                                     |
|                       | Nausea and vomiting                             |
| Physical independence | Able to look after own appearance               |
|                       | Able to return to work or usual home activities |
| Psychological support | Able to communicate with family or friends      |
|                       | Getting support from hospital doctors and nurse |
| Emotional state       | Having a general feeling of well-being          |
|                       | Feeling comfortable and in control              |
|                       | Feeling anxious                                 |
|                       | Feeling depressed                               |

---

Abbreviations: QoR-15K, the translated Korean version of the 15-item Quality of Recovery questionnaire
